## 1 What matters to patients?: a timely question for Value Based Care

2 Meron Hirpa<sup>1¶</sup>, Tinsay Woreta<sup>2¶</sup>, Hilena Addis<sup>3&</sup>, Sosena Kebede<sup>4&</sup>

---

<sup>1</sup> Department of Medicine, Johns Hopkins School of Medicine, Baltimore, United States of America

<sup>2</sup> Division of Gastroenterology and Hepatology, Johns Hopkins University School of Medicine, Baltimore, Maryland, United States of America

<sup>3</sup> Clinical Research Unit, University of Pennsylvania, Philadelphia, Pennsylvania, United States of America

<sup>4</sup> Johns Hopkins Community Physicians - Remington, Baltimore, Maryland, United States of America

¶ These authors contributed equally to this work.

& These authors also contributed equally to this.

3 **Abstract**

4 **Background**

5 Our healthcare system is moving towards patient-centered and value-based care models that  
6 prioritize health outcomes that matter to patients. However, little is known about what aspects  
7 of care patients would prioritize when presented with choices of desirable attributes and  
8 whether these patient priorities differ based on certain demographics.

9 **Objective**

10 To assess patients' priorities for a range of attributes in ambulatory care consultations across  
11 five key health service delivery domains and determine potential associations between patient  
12 priorities and certain demographic profiles.

13 **Methods**

14 Using a *What Matters to You* survey patients ranked in order of importance various choices  
15 related to five health service domains (patient-physician relationship, personal responsibility,  
16 tests/procedures, medications and cost). Subjects were selected from two Johns Hopkins  
17 affiliated primary care clinics and a third gastroenterology subspecialty clinic over a period of 11  
18 months. We calculated the percentage of respondents who selected each quality as their top 1-  
19 3 choice. Univariate and multivariate analyses determined demographic characteristics  
20 associated with patient priorities.

21 **Results**

22 Humanistic qualities of physicians, leading a healthy lifestyle, shared decision making (SDM) for  
23 medications and tests/procedures and knowledge about insurance coverage were the most  
24 frequently ranked choices. Privately insured and more educated patients were less likely to  
25 rank humanistic qualities highly. Those with younger age, higher educational attainment and  
26 private insurance had higher odds of ranking healthy lifestyle as a top choice. Those with more  
27 education had higher odds of ranking SDM as a top choice.

28 **Conclusions**

29 Identifying what matters most to patients is useful as we move towards patient-centered and  
30 value based care models. Our findings suggest that patients have priorities on qualities they  
31 value across key health service domains. Multiple factors including patient demographics can  
32 be predictors of these priorities. Elucidating these preferences is a challenging but a valuable  
33 step in the right direction.

34

35 **Introduction**

36 Health systems are moving towards a Value Based Care (VBC) model of service delivery which  
37 focuses on health outcomes and cost containment.[1-6] One commonly accepted definition of  
38 value-based healthcare is “the creation and operation of a health system that explicitly

---

39 prioritizes health outcomes which matter to patients relative to the cost of achieving this  
40 outcome.”[5] A related care philosophy, Patient Centered Care (PCC) also highlights the  
41 importance of addressing what matters to patients during their healthcare experience.[7-11]  
42 One challenge in the measurement of patient experience is the difficulty of differentiating  
43 among multiple overlapping terms like satisfaction, engagement, perceptions, priorities, values  
44 and preferences.[12-14] Patient preference and value can also be highly dynamic and  
45 dependent on several factors including patients’ health status, and personal characteristics  
46 such as education level.[16-19]  
47 Despite the limitations of patient-reported measures, patient surveys can provide helpful data  
48 to identify patient preferences and values. That in turn can improve the delivery of patient-  
49 centered health services, quality of care and outcomes.[12,16,20]  
50 Patients value both the *technical* (quality of clinical care: such as provider knowledge and skill)  
51 and the *interpersonal* (quality of communication: such as Shared Decision Making) qualities of  
52 care.[22-24] Multiple studies identify patient-provider communication to be the most important  
53 aspect of care that patients value for high-quality health care regardless of variations in socio-  
54 demographic or health characteristics of patients.[4,17,25-27] Some evidence exists that when  
55 choosing a primary care physician, the majority of patients have a strong preference for  
56 physicians of high technical quality if forced to make a tradeoff between interpersonal and  
57 technical skills.[19,28-30]  
58 How value of the various attributes of healthcare may vary by certain patient demographics  
59 and reasons for presentation in the ambulatory primary care setting has been postulated  
60 before.[15,31] There is data that suggests low-income patients, those with a high prevalence of

61 psychosocial problems and those feeling unwell have a preference for good communication and  
62 personal interaction when compared to their counterparts.[11,15,32] Some studies have shown  
63 that older patients are less likely to prioritize good communication[11,19] whereas other  
64 studies show that older patients at the end of life valued effective communication and trust of  
65 the provider.[32]

66 There is limited research examining how patients would prioritize a list of desirable attributes  
67 about specific aspects of their care, if forced to make choices. To our knowledge no study has  
68 examined patients' priorities across key healthcare domains that we tested with concurrent  
69 assessment of demographic associations.

70 In this observational study, we assessed patients' priorities for a range of attributes in  
71 ambulatory care consultations across 5 domains: patient-physician relationship, personal  
72 responsibility, tests/procedures, medications and healthcare cost and then examined potential  
73 association between patient priorities with certain demographic profiles.

74

## 75 **Methods**

### 76 **Survey Development**

77 We developed a 5-question survey instrument, *What Matters to You*, using 5 key health service  
78 domains: patient-physician relationship, personal responsibility, tests/procedures, medications  
79 and healthcare cost. These health service domains were previously used to determine level of  
80 shared understanding between patients and their physicians.[23,33-36] We asked patients to  
81 rank in order of importance various choices related to the 5 domains (see table 2 and Appendix).

82 To determine whether priorities varied among subgroups of patients, we collected demographic  
83 data including age, sex, ethnicity, highest level of education and type of medical insurance.

#### 84 **Participants**

85 The subjects of this study were patients being evaluated at two Johns Hopkins affiliated primary  
86 care clinics and a third gastroenterology subspecialty clinic: Johns Hopkins Community  
87 Physicians-Remington (a primary care clinic in a suburban community in Baltimore), Johns  
88 Hopkins Community Physicians-East Baltimore Medical Center (a primary care clinic in an urban  
89 underserved community in East Baltimore) and Johns Hopkins Gastroenterology and Hepatology  
90 Clinic (a gastroenterology outpatient clinic in a suburban community 30 minutes south of  
91 Baltimore). The Johns Hopkins Institutional Review Board and the Johns Hopkins Community  
92 Physicians Research and Projects Committee approved this study. All participants were advised,  
93 verbally and in a written form, that their completion of the survey will serve as their consent to  
94 be in the research study.

95

#### 96 **Study Design, Sample Size and Data Collection**

97 From 7/1/2018-6/30/2019, a total of 338 patients were surveyed prior to seeing their physician  
98 in clinic. A predominant number of patients surveyed (n=298) were primary care patients. After  
99 patients were roomed for their visit, before seeing their physicians, patients were asked if they  
100 would participate in a 5-10-minutes self-administered survey designed to assess their  
101 preferences surrounding the healthcare service they receive.

102

#### 103 **Measures**

104 Our main outcome measures were based on the participants' ranking of three to four important  
105 qualities under each of the five domains in the order of their personal priority.

106 There are 3 specific outcome measures we looked at:

107 1) What specific qualities under each healthcare domain were most frequently ranked as the  
108 number one choice.

109 2) What patients ranked as their second and third choices, as we recognized that we were  
110 'forcing' patients to choose from a list of desirable attributes and wanted to assess whether there  
111 would be clear "winners"

112 3) Patients' demographics as potential predictors of the most frequent top choice under each of  
113 the five healthcare domains.

114

### 115 **Statistical Analysis**

116 Incomplete and erroneously completed questionnaires (n=112) were excluded from analysis.

117 Data from the accurately completed questionnaires (n=226, 196 of which were primary care  
118 patients) were aggregated and analyzed using Excel and Stata 15.1. Some patients inadvertently  
119 received a version of the survey that had 4 choices for question four instead of 5 and 4 choices  
120 for question 5 instead of 3. Therefore, of the accurately completed surveys (n=226), an additional  
121 53 and 95 surveys were excluded from analysis for questions 4 and 5, respectively. As a result,  
122 when calculating percent respondents for questions 4 and 5, 173 surveys for question 4 and 132  
123 surveys for question five were analyzed.

124 To assess which qualities were most important for patients under each of the five domains, the  
125 percentage of respondents who selected each quality as their number one choice were

126 determined. Since patients were forced to prioritize among a list of desirable attributes, the  
127 qualities that were ranked as the most frequent second and third choice were also determined.  
128 For questions that had greater than or equal to four choices (Questions 1 and 4), the most  
129 frequent first, second, and third choices were calculated while only the most frequent first and  
130 second choices were calculated for questions that had three choices (Questions 2, 3 and 5).  
131 Univariate and multivariate logistic regression analyses were used to determine whether patient  
132 characteristics such as age, sex, race, education and insurance type were significant predictors of  
133 the qualities most frequently ranked as number one for each of the five domains.  
134 During analysis, for Question 1, the choices “Kindness” and “Efforts to connect with me as a  
135 human being and not just as a patient” were combined under the heading “humanistic qualities”.  
136 For Question 2, survey option “Learn as much as I can about my condition and be actively involved  
137 in decision making” was categorized as “shared decision making”. For Question 4, survey options  
138 “I want to know exactly what I am taking and why” and “I want to understand the side effects of  
139 each medication thoroughly before accepting the prescription” were combined under the  
140 heading “shared decision making”.

141

## 142 **Results**

143 **Table 1** shows the distribution of participants according to age, gender, race, education level  
144 and health insurance. The mean age was 42.6 years. The study population was predominantly  
145 female (77.9%); 54% had college or post graduate degrees, 45.9% had some college or below  
146 education; and 74.1% were privately insured. There were about an equal percentage of Blacks  
147 (41.6%) and Whites (44.7%).



148

149

Table 1 Demographics of Overall Study Population (N = 226)

| Characteristic      | N (%)         |
|---------------------|---------------|
| Age (years)         | 42.6* (19-83) |
| Sex                 |               |
| Female              | 176 (77.9)    |
| Male                | 50 (22.1)     |
| Race                |               |
| Black               | 94 (41.6)     |
| White               | 101 (44.7)    |
| Other               | 31 (13.7)     |
| Education           |               |
| High school or less | 41 (18.1)     |
| Some college        | 63 (27.9)     |
| College graduate    | 32 (14.2)     |
| Postgraduate degree | 90 (39.8)     |
| Insurance           |               |
| Medicaid            | 24 (10.9)     |
| Medicare            | 27 (12.3)     |
| Private             | 163 (74.1)    |
| Other               | 6 (2.7)       |

150

151

\*Mean (range)

152 **Table 2** shows the percentage of patient respondents who ranked each quality as number one  
153 under each of the five domains. For question one assessing patient-physician relationship,  
154 “humanistic qualities<sup>1</sup>” (33%) was the most frequent number one choice while knowledge of  
155 the physician and ability to explain things fully were tied at 23% as the second most frequent  
156 top choice. For question number two assessing patient personal responsibility, leading a  
157 healthy lifestyle (47%) was the most frequent top choice while shared decision making<sup>2</sup> (35%)  
158 and following medical recommendations (18%) were the second and third top choices,  
159 respectively. For question number three on tests and procedures, the most frequent top choice  
160 was shared decision making (50%) while wanting all tests that could be helpful (43%) and only  
161 wanting the absolute critical tests (7%) were the second and third top choices, respectively. On  
162 question four assessing medications, shared decision making<sup>3</sup> (80%) was the most frequent top  
163 choice while wanting the absolute minimum medications (9%) and wanting any medication that

164 could help (9%) were the most frequent second choice. Wanting the freedom to try alternative  
 165 medicine and herbal supplements (2%) was the least frequent choice. On question five  
 166 assessing healthcare cost, knowing what insurance covers (57%) was the most frequent choice  
 167 while knowing what charges are for (32%) and minimizing healthcare expenditure (11%) were  
 168 the second and third choices, respectively.

169

170 Table 2 The percentage of respondents who selected each quality as top choice.

| <b>Patient-Physician Relationship N=226</b>         | <b>Percent Respondents</b> |
|-----------------------------------------------------|----------------------------|
| Humanistic qualities <sup>5</sup>                   | 33%                        |
| Fund of knowledge                                   | 23%                        |
| Explaining things fully and in the way I understand | 23%                        |
| Involving me in decision-making                     | 8%                         |
| Being on time                                       | 7%                         |
| Spending adequate time with me                      | 6%                         |

| <b>Personal Responsibility N=226</b>        | <b>Percent Respondents</b> |
|---------------------------------------------|----------------------------|
| Exercise, diet and lead a healthy lifestyle | 47%                        |
| Shared decision making <sup>6</sup>         | 35%                        |
| Follow medical recommendations given        | 18%                        |

| <b>Tests and Procedures N=226</b>                                            | <b>Percent Respondents</b> |
|------------------------------------------------------------------------------|----------------------------|
| Shared decision making                                                       | 50%                        |
| I want all the tests that could be helpful to understand my condition better | 43%                        |
| I only want the absolute critical tests to be performed                      | 7%                         |

| <b>Medications N=173*</b>           | <b>Percent Respondents</b> |
|-------------------------------------|----------------------------|
| Shared decision making <sup>7</sup> | 80%                        |

|                                                                       |    |
|-----------------------------------------------------------------------|----|
| I want the absolute minimum that I need to take for my condition      | 9% |
| I want to take anything that can possibly help my condition           | 9% |
| I want the freedom to try alternative medicine and herbal supplements | 2% |

| Healthcare Cost N=132**                            | Percent Respondents |
|----------------------------------------------------|---------------------|
| I want to know what my health insurance covers     | 57%                 |
| I want to know exactly what I am being charged for | 32%                 |
| I want to minimize my healthcare expenditure       | 11%                 |

171

172 Combines respondents who picked the survey options “Kindness” and “Efforts to connect with me as a human  
173 being and not just as a patient”.

174 <sup>2</sup> Survey option was “Learn as much as I can about my condition and be actively involved in decision making”.

175 <sup>3</sup> Combines respondents who picked the survey options “I want to know exactly what I am taking and why” and “I  
176 want to understand the side effects of each medication thoroughly before accepting the prescription”.

177 \*Excluding 53 participants who were provided 4 choices instead of 5 choices for Question #4

178 \*\*Excluding 95 participants who were provided 4 choices instead of 3 choices for Question #5

179

180 **Table 3** shows the top three most frequently selected qualities for each question.<sup>4</sup> For question

181 one assessing patient-physician relationship, humanistic qualities was the most frequent first

182 (33%), second (24%) and third (30%) choice. For question number two assessing personal

183 responsibility, healthy lifestyle (47%) was the most frequent top choice while learning about

184 condition (38%) was the most frequent second choice. For tests and procedures, understanding

185 the importance of diagnostic tests was the most frequent first (50%) and second (39%) choice.

186 On question four assessing medications, understanding indication and side effects of

187 medications was the most frequent first (80%), second (57%) and third (41%) choice. For

188 question five on healthcare cost, knowing what insurance covers (58%) was the most frequent

189 first choice while understanding charges (43%) was the most frequent second choice.

190

191 Table 3 Top 1-3 qualities selected by respondents<sup>4</sup>

| Questions | Most frequent first choice | Most frequent second choice | Most frequent third choice |
|-----------|----------------------------|-----------------------------|----------------------------|
|-----------|----------------------------|-----------------------------|----------------------------|

|                                                 |                                                                     |                                                                     |                                                                     |
|-------------------------------------------------|---------------------------------------------------------------------|---------------------------------------------------------------------|---------------------------------------------------------------------|
| Q 1 (Patient-physician Relationship)<br>N = 226 | Humanistic Qualities<br><b>33%</b>                                  | Humanistic Qualities<br><b>24%</b>                                  | Humanistic Qualities<br><b>30%</b>                                  |
| Q 2 (Personal Responsibility)<br>N = 226        | Healthy Lifestyle<br><b>47%</b>                                     | Learning about condition<br><b>38%</b>                              | _____                                                               |
| Q 3 (Tests and Procedures)<br>N = 226           | Understand importance of diagnostic tests<br><b>50%</b>             | Understand importance of diagnostic test<br><b>39%</b>              | _____                                                               |
| Q 4 (Medications)<br>N = 173*                   | Understand indication and side effects of medications<br><b>80%</b> | Understand indication and side effects of medications<br><b>57%</b> | Understand indication and side effects of medications<br><b>41%</b> |
| Q 5 (Healthcare cost)<br>N = 132**              | Know what insurance covers<br><b>58%</b>                            | Know what my charges are<br><b>43%</b>                              | _____                                                               |

192  
193  
194  
195  
196  
197  
198

<sup>4</sup> For questions that had four or more choices (Questions 1 and 4), the most frequent first, second, and third choices were calculated while the most frequent first and second choices was calculated for questions that had three choices (Questions 2, 3 and 5).

\*Excluding 53 participants who were provided 4 choices instead of 5 choices for Question #4

\*\*Excluding 95 participants who were provided 4 choices instead of 3 choices for Question #5

199 **Table 4** shows univariate analysis for demographic predictors of the most frequent top choice  
200 for each question (Q1: “humanistic qualities”; Q2: “healthy lifestyle”; Q3: “shared decision  
201 making”; Q4: “shared decision making” and Q5: “knowing insurance coverage”). When  
202 assessing patient-physician relationship, patients with college and above degrees and those  
203 with private insurance were less likely to rank humanistic qualities as their top choice compared  
204 to their references (0.55, CI 0.31-0.98 and 0.26, CI 0.11-0.64, respectively). For question two  
205 assessing patient personal responsibility, those 45 and older were less likely to rank healthy  
206 lifestyle as their number one choice when compared to those younger than 35 (0.20, CI 0.10-  
207 0.41 and 0.29, CI 0.11-0.77). Participants who identified their race as “Other”, those who had a  
208 college and above education and privately insured patients had higher odds of ranking healthy  
209 lifestyle as their number one choice compared to their references (2.55, CI 1.11-5.87; 4.25, CI  
210 2.28-7.91 and 8.42, CI 2.42-29.33, respectively). When assessing preferences on tests and

211 procedures, shared decision making was less likely to be ranked as a number one choice by  
 212 those older than 65 (0.35, CI 0.13-0.99) but more likely to be ranked as a top choice by those  
 213 with college and above education (2.01, CI 1.14-3.55) when compared to their respective  
 214 references. With regards to medications, those who identified their race as “Other” had lower  
 215 odds of choosing shared decision making as their top choice when compared to Blacks (0.24, CI  
 216 0.08-0.71). We saw no significant predictors for question five that assessed healthcare cost.

217 Table 4 Univariate analysis for Predictors of Most Frequent Top Choice for Each Question

|                                                  | Question #1<br>Patient-physician<br>Relationship | Question #2<br>Personal<br>Responsibility | Question #3<br>Tests and<br>Procedures   | Question #4<br>Medications            | Question #5<br>Healthcare cost    |
|--------------------------------------------------|--------------------------------------------------|-------------------------------------------|------------------------------------------|---------------------------------------|-----------------------------------|
| Most frequent top<br>choice                      | Humanistic<br>Qualities                          | Healthy Lifestyle                         | Shared Decision<br>Making                | Shard Decision<br>Making <sup>3</sup> | Know Insurance<br>coverage        |
|                                                  | OR (95% C.I.)                                    | OR (95% C.I.)                             | OR (95% C.I.)                            | OR (95% C.I.)                         | OR (95% C.I.)                     |
| < 35                                             | 1 [Reference]                                    | 1 [Reference]                             | 1 [Reference]                            | 1 [Reference]                         | 1 [Reference]                     |
| 35-44                                            | 0.80 (0.39-1.64)                                 | 0.53 (0.27-1.05)                          | 1.48 (0.75-2.93)                         | 0.44 (0.15-1.26)                      | 1.04 (0.42-2.58)                  |
| 45-64                                            | 0.69 (0.34-1.41)                                 | <b>0.20 (0.10-0.41)</b>                   | 0.97 (0.50-1.87)                         | 0.38 (0.14-1.03)                      | 1.08 (0.45-2.60)                  |
| >= 65                                            | 1.11 (0.43-2.88)                                 | <b>0.29 (0.11-0.77)</b>                   | <b>0.35 (0.13-0.99)</b>                  | 0.28 (0.07-1.16)                      | 0.88 (0.27-2.83)                  |
| Sex                                              |                                                  |                                           |                                          |                                       |                                   |
| Female                                           | 1 [Reference]                                    | 1 [Reference]                             | 1 [Reference]                            | 1 [Reference]                         | 1 [Reference]                     |
| Male                                             | 0.83 (0.42-1.64)                                 | 0.68 (0.36-1.29)                          | 0.59 (0.31-1.13)                         | 0.61 (0.26-1.41)                      | 0.57 (0.25-1.30)                  |
| Race                                             |                                                  |                                           |                                          |                                       |                                   |
| Black                                            | 1 [Reference]                                    | 1 [Reference]                             | 1 [Reference]                            | 1 [Reference]                         | 1 [Reference]                     |
| White                                            | 0.90 (0.50-1.62)                                 | 1.71 (0.97-3.02)                          | 1.55 (0.88-2.72)                         | 0.63 (0.26-1.53)                      | 0.65 (0.30-1.38)                  |
| Other                                            | 0.76 (0.31-1.83)                                 | <b>2.55 (1.11-5.87)</b>                   | 1.57 (0.69-3.55)                         | <b>0.24 (0.08-0.71)</b>               | 0.31 (0.10-1.04)                  |
| Education                                        |                                                  |                                           |                                          |                                       |                                   |
| Some college<br>Or below<br>College and<br>Above | 1 [Reference]<br><b>0.55 (0.31-0.98)</b>         | 1 [Reference]<br><b>4.25 (2.28-7.91)</b>  | 1 [Reference]<br><b>2.01 (1.14-3.55)</b> | 1 [Reference]<br>1.03 (0.46-2.30)     | 1 [Reference]<br>0.51 (0.25-1.06) |
| Insurance                                        |                                                  |                                           |                                          |                                       |                                   |
| Medicaid                                         | 1 [Reference]                                    | 1 [Reference]                             | 1 [Reference]                            | 1 [Reference]                         | 1 [Reference]                     |
| Medicare                                         | 0.49 (0.16-1.50)                                 | 4.12 (0.98-17.38)                         | 0.42 (0.13-1.33)                         | 0.79 (0.16-4.00)                      | 2.98 (0.74-11.93)                 |
| Private                                          | <b>0.26 (0.11-0.64)</b>                          | <b>8.42 (2.42-29.33)</b>                  | 1.14 (0.49-2.70)                         | 0.57 (0.16-2.08)                      | 0.96 (0.38-2.44)                  |
| Other                                            | 0.71 (0.12-4.3)                                  | 3.5 (0.44-28.14)                          | 2 (0.31-13.06)                           | -                                     | 4.58 (0.46-45.61)                 |

218  
 219 <sup>3</sup>Combines respondents who picked the survey options “I want to know exactly what I am taking and why” and  
 220 “I want to understand the side effects of each medication thoroughly before accepting the prescription”.  
 221

222 **Table 5** shows multivariate analysis of demographic predictors of the most frequent top choice  
 223 for each question (Q1: “humanistic qualities”; Q2: “healthy lifestyle”; Q3: “shared decision

224 making”; Q4: “shared decision making” and Q5: “knowing insurance coverage”).The lower odds  
 225 of choosing “humanistic qualities” associated with private insurance compared to having  
 226 Medicaid persisted here (0.21, CI 0.07-0.65) but higher education dropped out when controlling  
 227 for all other demographic characteristics. In the personal responsibility domain, higher odds  
 228 associated with private insurance and higher education (5.73, CI 1.36-24.27 and 2.98, CI 1.34-  
 229 6.59 respectively) as well as the lower odds of older age choosing healthy lifestyle (0.23, CI  
 230 0.11-0.51 and 0.32, CI 0.10-0.97) persisted compared to their reference groups respectively.  
 231 When controlled for other factors, having “Other” race dropped out as a significant predictor  
 232 whereas being on Medicare appeared to have significantly higher odds of association with  
 233 choosing a healthy lifestyle compared to the Medicaid insured, although still with a very wide  
 234 Confidence Interval (5.98, CI 1.24-28.93). For tests and procedures, having college and above  
 235 education remained associated with higher odds of choosing SDM (2.30, CI 1.06-4.99)  
 236 compared to lower educational attainment. In the Medication category having “Other” race  
 237 persisted as having higher odds of choosing SDM compared to Blacks (0.16, CI 0.04-0.61). The  
 238 healthcare cost category remained without significant association with any of the  
 239 demographics we tested in both uni and multi-variate analyses.

240

241 Table 5 Multivariate Analysis for Predictors of Most Frequent Top Choice for Each Question

|                             | <b>Question #1</b><br>Patient-physician<br>Relationship | <b>Question #2</b><br>Personal<br>Responsibility | <b>Question #3</b><br>Tests and<br>Procedures | <b>Question #4</b><br>Medications     | <b>Question #5</b><br>Healthcare cost |
|-----------------------------|---------------------------------------------------------|--------------------------------------------------|-----------------------------------------------|---------------------------------------|---------------------------------------|
| Most frequent top<br>choice | Humanistic<br>Qualities                                 | Healthy Lifestyle                                | Shared Decision<br>Making                     | Shard Decision<br>Making <sup>3</sup> | Know Insurance<br>coverage            |
|                             | OR (95% C.I.)                                           | OR (95% C.I.)                                    | OR (95% C.I.)                                 | OR (95% C.I.)                         | OR (95% C.I.)                         |
| Age (in years)              |                                                         |                                                  |                                               |                                       |                                       |
| < 35                        | 1 [Reference]                                           | 1 [Reference]                                    | 1 [Reference]                                 | 1 [Reference]                         | 1 [Reference]                         |
| 35-44                       | 0.84 (0.39-1.80)                                        | 0.49 (0.23-1.03)                                 | 1.47 (0.71-3.01)                              | 0.33 (0.10-1.03)                      | 1.24 (0.47-3.32)                      |

|                       |                         |                          |                         |                         |                   |
|-----------------------|-------------------------|--------------------------|-------------------------|-------------------------|-------------------|
| 45-64                 | 0.61 (0.27-1.36)        | <b>0.23 (0.11-0.51)</b>  | 1.24 (0.60-2.58)        | 0.27 (0.09-0.86)        | 0.74 (0.26-2.11)  |
| >= 65                 | 0.98 (0.33-2.93)        | <b>0.32 (0.10-0.97)</b>  | 0.29 (0.08-1.01)        | 0.19 (0.04-0.1.02)      | 0.68 (0.17-2.66)  |
| Sex                   |                         |                          |                         |                         |                   |
| Female                | 1 [Reference]           | 1 [Reference]            | 1 [Reference]           | 1 [Reference]           | 1 [Reference]     |
| Male                  | 0.72 (0.34-1.50)        | 0.86 (0.42-1.77)         | 0.57 (0.29-1.14)        | 0.64 (0.25-1.61)        | 0.58 (0.24-1.42)  |
| Race                  |                         |                          |                         |                         |                   |
| Black                 | 1 [Reference]           | 1 [Reference]            | 1 [Reference]           | 1 [Reference]           | 1 [Reference]     |
| White                 | 1.84 (0.82-4.12)        | 0.67 (0.32-1.44)         | 1.56 (0.75-3.23)        | 0.65 (0.21-2.01)        | 0.84 (0.30-2.32)  |
| Other                 | 1.49 (0.51-4.30)        | 0.81 (0.29-2.24)         | 1.45 (0.56-3.77)        | <b>0.16 (0.04-0.61)</b> | 0.46 (0.12-1.85)  |
| Education             |                         |                          |                         |                         |                   |
| Some college or below | 1 [Reference]           | 1 [Reference]            | 1 [Reference]           | 1 [Reference]           | 1 [Reference]     |
| College and Above     | 0.66 (0.30-1.45)        | <b>2.98 (1.34-6.59)</b>  | <b>2.30 (1.06-4.99)</b> | 1.72 (0.58-5.12)        | 0.47 (0.16-1.37)  |
| Insurance             |                         |                          |                         |                         |                   |
| Medicaid              | 1 [Reference]           | 1 [Reference]            | 1 [Reference]           | 1 [Reference]           | 1 [Reference]     |
| Medicare              | 0.42 (0.13-1.37)        | <b>5.98 (1.24-28.93)</b> | 0.46 (0.14-1.57)        | 0.96 (0.16-5.85)        | 3.36 (0.78-14.49) |
| Private               | <b>0.21 (0.07-0.65)</b> | <b>5.73 (1.36-24.27)</b> | 0.50 (0.17-1.48)        | 0.47 (0.09-2.53)        | 1.77 (0.53-5.90)  |
| Other                 | 0.81 (0.13-5.13)        | 4.74 (0.50-45.22)        | 2.97 (0.42-20.95)       | -                       | 6.71 (0.61-74.20) |

242  
243  
244  
245  
246

<sup>3</sup> Combines respondents who picked the survey options “I want to know exactly what I am taking and why” and “I want to understand the side effects of each medication thoroughly before accepting the prescription”.

## 247 Discussion

248 Our study showed that in the patient-physician domain, humanistic quality was the most  
249 frequently ranked top 1-3 choice. This is consistent with other research findings which  
250 document that patient-physician interaction is viewed by most patients to be a highly  
251 important aspect of quality care.[4,17,23] The higher value our patient population seems to  
252 place on their physicians’ humanistic over technical qualities such as the physician’s fund of  
253 knowledge could be explained by the fact that this survey was conducted in the ambulatory  
254 setting where a higher proportion of patients who may require significant emotional support  
255 are seen, an association that has been documented before.[11,19] Another possible reason why  
256 our patients showed a stronger preference for humanistic quality over technical quality is that  
257 patients who come to reputable healthcare settings may assume that they will be cared for by

258 practitioners with superior technical abilities and hence tend to focus on their humanistic  
259 qualities instead.[37]

260 Although humanistic qualities appeared to be a highly valued choice for the domain of patient-  
261 physician relationship across the board, our uni and multi-variate analyses did show that the  
262 odds of choosing humanistic qualities was much lower for patients who had higher educational  
263 level (OR 0.55, CI 0.31-0.98) and or who were privately insured (OR 0.26, CI 0.11-0.64) as  
264 compared to lower educational level and Medicaid insured, a finding that has been noted  
265 before.[11,31] This may suggest that patients from lower socio-economic standing may have  
266 reasons to prioritize humanistic qualities in their care providers either because they don't  
267 typically encounter this quality or because they may have increased needs for it due to their life  
268 circumstances.

269 In the personal responsibility domain, our findings of high correlation between prioritizing  
270 exercise, diet and leading a healthy lifestyle over other qualities with younger age, and higher  
271 educational attainment has been noted before.[38-41] This may be explained by the fact that,  
272 younger people are more agile, and a higher socio-economic standing (implied by higher  
273 educational attainment) may afford better access to healthy amenities as well as the fact that  
274 higher socio-economic standing may also confer the psychological space needed for people to  
275 prioritize healthy lifestyle over other concerns that may be at the top of their mind.[42-46] The  
276 higher odds of choosing healthy lifestyle seen in our multivariate analysis for those who have  
277 Medicare and Private insurance compared to the Medicaid insured (OR 5.98, CI 1.24-28.9 and  
278 OR 5.73, CI 1.36-24.27) is a significant finding and may once again be related to access to



279 amenities in our patient population though this conclusion may carry less certainty for general  
280 interpretation due to the high confidence intervals.

281 Shared decision making (SDM) was the most frequently ranked top 1-3 choice for both “tests  
282 and procedures” and “medications” domains. The strong patient preference for SDM we found  
283 confirms the similar finding that has been noted before.[47,48] Clinicians will need to pay more  
284 attention to this aspect of care in the future as they will begin to see better informed patients  
285 come prepared to engage in decision making rather than to passively receive physician  
286 recommendations. The higher odds of choosing SDM by those with higher education in Q3 is  
287 also consistent with the evidence that better informed patients are likely to value and engage in  
288 SDM.[49,50] Explaining the higher odds we saw for choosing SDM for Q4 among those with  
289 “other” race would require a sub-subgroup analysis that was not performed here. In addition,  
290 loss of 53 surveys in this question may have reduced the power to detect other potentially  
291 significant associations in this category.

292 A question that asks patients to indicate their preference for knowing what their insurance  
293 covers and one that asks their preference to knowing what they are being charged for (two  
294 choices for Q5) is potentially confusing as one choice could be seen as a subset of the other.  
295 Despite that, it is clear that virtually all patients do care about the cost of care, especially the  
296 portion covered by insurance and/or themselves. Only a minority of those surveyed (11%)  
297 prioritized minimizing their healthcare expenditure which may indicate a related concept to the  
298 common health economics observation of moral hazard- where insured patients (virtually all  
299 our patients) may typically lack an incentive to prioritize healthcare cost minimization.

300 Our study has some weaknesses. The survey is liable to the inherent weakness of developing  
301 similar surveys discussed in the introduction. We attempted to mitigate some of that by  
302 designing it using similar survey concepts published previously,[33] and piloting the instrument  
303 before rolling out the project. Our survey population was mostly privately insured females  
304 which may limit the generalizability of some of our findings, but we have demonstrated  
305 statistically significant results from our logistic regressions that is worth replicating in a larger  
306 study to evaluate these findings. Incomplete and inaccurate completion of surveys that were  
307 excluded may have caused selection bias in our patient samples in addition to reducing our  
308 power in the analysis of results. Several patients who erroneously completed the surveys  
309 ranked multiple choices equally. Although this may be due to our survey design needing more  
310 clarity (as in for Q5) one of the inherent difficulty of accurately capturing patient priorities is  
311 their unwillingness to trade between quality attributes, a finding seen in studies with discrete  
312 choice experiments.[11] Given the move towards a patient centered model of care delivery, it  
313 will be important for the future to develop a validated instrument that captures what matters  
314 to patients in different settings.

315 Our study contributes to the growing body of evidence that patient centeredness and  
316 understanding patient priorities are essential for value-based care. Our findings are in line with  
317 other published studies that suggest that humanistic qualities,[4,17,23] healthy lifestyle,[38-41]  
318 and shared decision making[47,48] are important. In addition, our results extend what is known  
319 by showing that patients still prioritize these qualities even when offered equally attractive  
320 alternatives, and these priorities are associated with certain patient level factors.

321 In conclusion, the delivery of effective and quality medical care requires understanding of what  
322 most matters to patients. The task of deciphering the multiple factors that may affect patient  
323 priorities for what they value is a real challenge and may be criticized for having biases related  
324 to wording and context.[16] However, it is still a useful endeavor that can help clarify further  
325 what we may be able to achieve in our move towards a Value Based Care model that  
326 incorporates patients' experience.

327

328 **Acknowledgments** We would like to thank all patient participants who were surveyed. We also  
329 thank Leah Jager, PhD for assistance with statistical analysis and Rachael Lebo for assistance  
330 with literature review.

331

## 332 REFERENCES

- 333 1. Porter M, Pabo E, Lee T. Redesigning Primary Care: A Strategic Vision To Improve Value  
334 By Organizing Around Patients' Needs. *Health Affairs*. 2013;32(3):516-525.
- 335 2. Porter M. What Is Value in Health Care?. *New England Journal of Medicine*.  
336 2010;363(26):2477-2481.
- 337 3. Tseng E, Hicks L. Value Based Care and Patient-Centered Care: Divergent or  
338 Complementary?. *Current Hematologic Malignancy Reports*. 2016;11(4):303-310.
- 339 4. Mohammed K, Nolan M, Rajjo T, Shah N, Prokop L, Varkey P et al. Creating a Patient-  
340 Centered Health Care Delivery System: A Systematic Review of Health Care Quality From  
341 the Patient Perspective. *American Journal of Medical Quality*. 2016;31(1):12-21.
- 342 5. Shah A. Value-Based Health Care, a Global Assessment. *The Economist Intelligence Unit*.  
343 2016.
- 344 6. Putera I. Redefining Health: Implication for Value-Based Healthcare Reform. *Cureus*  
345 [Internet]. 2017. Available from: <https://doi.org/10.7759/cureus.1067>
- 346 7. Patterson K. Why understanding what matters to the patient matters. *Journal of*  
347 *Integrated Care* [Internet]. 2017;25(1):17-25. Available from:  
348 <https://doi.org/10.1108/jica-08-2016-0027>
- 349 8. Wolfe A. Institute of Medicine Report: Crossing the Quality Chasm: A New Health Care  
350 System for the 21st Century. *Policy, Politics & Nursing Practice*. 2001;2(3):233–235.
- 351 9. Picker NRC. Eight Dimensions of Patient-Centered Care. *NRC Picker*. 2008.

- 352 10. Blount A. Getting to Patient-Centered Care. Patient-Centered Primary Care [Internet].  
353 2019. Available from: [https://doi.org/10.1007/978-3-030-17645-7\\_1](https://doi.org/10.1007/978-3-030-17645-7_1)
- 354 11. Little P, Everitt H, Williamson I, Warner G, Moore M, Gould C et al. Observational study of  
355 effect of patient centredness and positive approach on outcomes of general practice  
356 consultations. *BMJ*. 2001;323(7318):908-911.
- 357 12. LaVela S, Gallan A. Evaluation and measurement of patient experience. *Patient*  
358 *Experience Journal*. 2014;1(1):28-36.
- 359 13. Brennan P, Strombom I. Improving Health Care by Understanding Patient Preferences:  
360 The Role of Computer Technology. *Journal of the American Medical Informatics*  
361 *Association*. 1998;5(3):257-262.
- 362 14. Dirksen C, Utens C, Joore M, van Barneveld T, Boer B, Dreesens D et al. Integrating  
363 evidence on patient preferences in healthcare policy decisions: protocol of the patient-  
364 VIP study. *Implementation Science*. 2013;8(1).
- 365 15. Fletcher R, O'Malley M, Earp J, Littleton T, Fletcher S, Greganti M et al. Patients' Priorities  
366 for Medical Care. *Medical Care*. 1983;21(2):234-242.
- 367 16. Manary M, Boulding W, Staelin R, Glickman S. 2013. The Patient Experience and Health  
368 Outcomes. *The New England Journal of Medicine*. 2013;368(3):201-203.
- 369 17. Paddison C, Abel G, Ronald M, Elliott M, Lyratzopoulos G, Campbell J. Drivers of Overall  
370 Satisfaction with Primary Care: Evidence from the English General Practice Patient  
371 Survey. *Health Expectations: An International Journal of Public Participation in Health*  
372 *Care and Health Policy* 2015;18(5):1081-1092.
- 373 18. Scott A, Smith R. Keeping the Customer Satisfied: Issues in the Interpretation and Use of  
374 Patient Satisfaction Surveys. *International Journal for Quality in Health Care: Journal of*  
375 *the International Society for Quality in Health Care / ISQua* 1994;6(4):353-559.
- 376 19. Murakami G, Imanaka Y, Kobuse H, Lee J, Goto E. Patient perceived priorities between  
377 technical skills and interpersonal skills: their influence on correlates of patient  
378 satisfaction. *Journal of Evaluation in Clinical Practice*. 2010;16(3):560-568.
- 379 20. Russo S, Jongerius C, Faccio F, Pizzoli S, Pinto C, Veldwijk J et al. Understanding Patients'  
380 Preferences: A Systematic Review of Psychological Instruments Used in Patients'  
381 Preference and Decision Studies. *Value in Health*. 2019;22(4):491-501.
- 382 21. Flott, K, Graham C, Darzi A, Mayer E. 2017. Can We Use Patient-Reported Feedback to  
383 Drive Change? The Challenges of Using Patient-Reported Feedback and How They Might  
384 Be Addressed. *BMJ Quality & Safety*. 2017;26(6):502-507.
- 385 22. Peter E. Concepts of trust in patients with serious illness focused on physician  
386 interpersonal and technical competence. *Evidence-Based Nursing*. 2001;4(3):95
- 387 23. Wensing M, Jung H, Mainz J, Olesen F, Grol F. 1998. A Systematic Review of the  
388 Literature on Patient Priorities for General Practice Care. Part 1: Description of the  
389 Research Domain. *Social Science & Medicine*. 1998;47(10):1573-1588.
- 390 24. Vahdat S, Hamzehgardeshi L, Hessam S, Hamzehgardeshi Z. Patient Involvement in  
391 Health Care Decision Making: A Review. *Iranian Red Crescent Medical Journal*.  
392 2014;16(1).
- 393 25. Anderson Rr, Barbara A, Feldman S. What Patients Want: A Content Analysis of Key  
394 Qualities That Influence Patient Satisfaction. *The Journal of Medical Practice*  
395 *Management: MPM*. 2007;22(5):255-61.

- 396 26. Epstein R, Franks P, Fiscella K, Shields C, Meldrum S, Kravitz R, et al. 2005. Measuring  
397 Patient-Centered Communication in Patient–Physician Consultations: Theoretical and  
398 Practical Issues. *Social Science & Medicine*. 2005;61(7):1516–1528.
- 399 27. Doyle C, Reed J, Woodcock T, Bell D. Understanding What Matters to Patients--  
400 Identifying Key Patients' Perceptions of Quality. *JRSM Short Reports*. 2010;1(1):1–6.
- 401 28. Fung C, Elliott M, Hays R, Kahn K, Kanouse D, McGlynn E, et al. 2005. Patients'  
402 Preferences for Technical versus Interpersonal Quality When Selecting a Primary Care  
403 Physician. *Health Services Research*. 2005;40(4):957–977.
- 404 29. Tokunaga J, Imanaka Y, Nobutomo K. Effects of Patient Demands on Satisfaction with  
405 Japanese Hospital Care. *International Journal for Quality in Health Care: Journal of the*  
406 *International Society for Quality in Health Care / ISQua*. 2000;12(5): 395–401.
- 407 30. Cheraghi-Sohi S, Hole A, Mead N, McDonald R, Whalley D, Bower P et al. What Patients  
408 Want from Primary Care Consultations: A Discrete Choice Experiment to Identify  
409 Patients' Priorities. *Annals of Family Medicine*. 2008;6(2):107–115.
- 410 31. DeLia D, Hall A, Prinz T, Billings J. What Matters to Low-Income Patients in Ambulatory  
411 Care Facilities? *Medical Care Research and Review: MCRR*. 2004;61(3):352–375.
- 412 32. Heyland D, Dodek P, Rocker G, Groll D, Gafni A, Pichora D et al. What Matters Most in  
413 End-of-Life Care: Perceptions of Seriously Ill Patients and Their Family Members. *CMAJ:*  
414 *Canadian Medical Association Journal*. 2006;174(5):627–633.
- 415 33. Kebede S, Shihab HM, Berger ZD, Shah NG, Yeh H-C, Brotman DJ. Patients' Understanding  
416 of Their Hospitalizations and Association With Satisfaction. *JAMA Internal Medicine*.  
417 2014;174(10):1698–1700.
- 418 34. Orom H, Underwood W, Cheng Z, Homish DL, Scott I. Relationships as Medicine: Quality  
419 of the Physician-Patient Relationship Determines Physician Influence on Treatment  
420 Recommendation Adherence. *Health Services Research*. 2018;53(1):580–596
- 421 35. Jallinoja P, Absetz P, Kuronen R, Nissinen A, Talja M, Uutela A, et al. The dilemma of  
422 patient responsibility for lifestyle change: Perceptions among primary care physicians  
423 and nurses. *Scandinavian Journal of Primary Health Care*. 2007;25(4):244–249
- 424 36. Hoffmann TC, Del Mar C. Patients' expectations of the benefits and harms of treatments,  
425 screening, and tests: a systematic review. *JAMA Intern Med*. 2015;175:274–286.
- 426 37. Wu C-C. The impact of hospital brand image on service quality, patient satisfaction and  
427 loyalty. *African Journal of Business Management*. 2011;5:4873–4882.
- 428 38. Salmela SM, Vahasarja KA, Villberg JJ, Vanhala MJ, Saaristo TE, Lindstrom J, et al.  
429 Perceiving Need for Lifestyle Counseling: Findings from Finnish individuals at high risk of  
430 type 2 diabetes. *Diabetes Care*. 2011;35(2):239–241
- 431 39. Lakerveld J, Ijzelenberg W, Tulder MWV, Hellemans IM, Rauwerda JA, Rossum ACV, et al.  
432 Motives for (not) participating in a lifestyle intervention trial. *BMC Medical Research*  
433 *Methodology*. 2008;8(1):17.
- 434 40. Chinn D, White M, Howel D, Harland J, Drinkwater C. Factors associated with non-  
435 participation in a physical activity promotion trial. *Public Health*. 2006;120(4):309–319.
- 436 41. Bukman AJ, Teuscher D, Feskens EJM, Baak MAV, Meershoek A, Renes RJ. Perceptions on  
437 healthy eating, physical activity and lifestyle advice: opportunities for adapting lifestyle  
438 interventions to individuals with low socioeconomic status. *BMC Public Health*.  
439 2014;14(1).

- 440 42. Mullainathan S, Shafir E. Scarcity: Why Having Too Little Means So Much. Macmillan  
441 2013.
- 442 43. Bukman AJ, Teuscher D, Feskens EJM, Baak MAV, Meershoek A, Renes RJ. Perceptions on  
443 healthy eating, physical activity and lifestyle advice: opportunities for adapting lifestyle  
444 interventions to individuals with low socioeconomic status. BMC Public Health.  
445 2014;**14**(1).
- 446 44. Bertoni AG, Foy CG, Hunter JC, Quandt SA, Vitolins MZ, Whitt-Glover MC. A Multilevel  
447 Assessment of Barriers to Adoption of Dietary Approaches to Stop Hypertension (DASH)  
448 among African Americans of Low Socioeconomic Status. Journal of Health Care for the  
449 Poor and Underserved. 2011;22(4):1205–1220
- 450 45. Inglis V, Ball K, Crawford D. Why do women of low socioeconomic status have poorer  
451 dietary behaviours than women of higher socioeconomic status? A qualitative  
452 exploration. Appetite 2005;45:334–43.
- 453 46. Gray PM, Murphy MH, Gallagher AM, Simpson EEA. Motives and Barriers to Physical  
454 Activity Among Older Adults of Different Socioeconomic Status. Journal of Aging and  
455 Physical Activity. 2016;24(3):419–429.
- 456 47. Chwning B, Bylund CL, Shah B, Arora NK, Gueguen JA, Makoul G. Patient preferences for  
457 shared decisions: A systematic review. Patient Education and Counseling. 2012;86(1):9–  
458 18.
- 459 48. Shay LA, Lafata JE. Where is the evidence? A systematic review of shared decision making  
460 and patient outcomes. Med Decis Making. 2015;35:114–131.
- 461 49. Vick S, Scott A. Agency in health care. Examining patients' preferences for attributes of  
462 the doctor–patient relationship. J Health Econ. 1998;17:587–605.
- 463 50. Say R, Murtagh M, Thomson R. Patients' preference for involvement in medical decision  
464 making: a narrative review. Patient Educ Couns. 2006;60:102–14.
